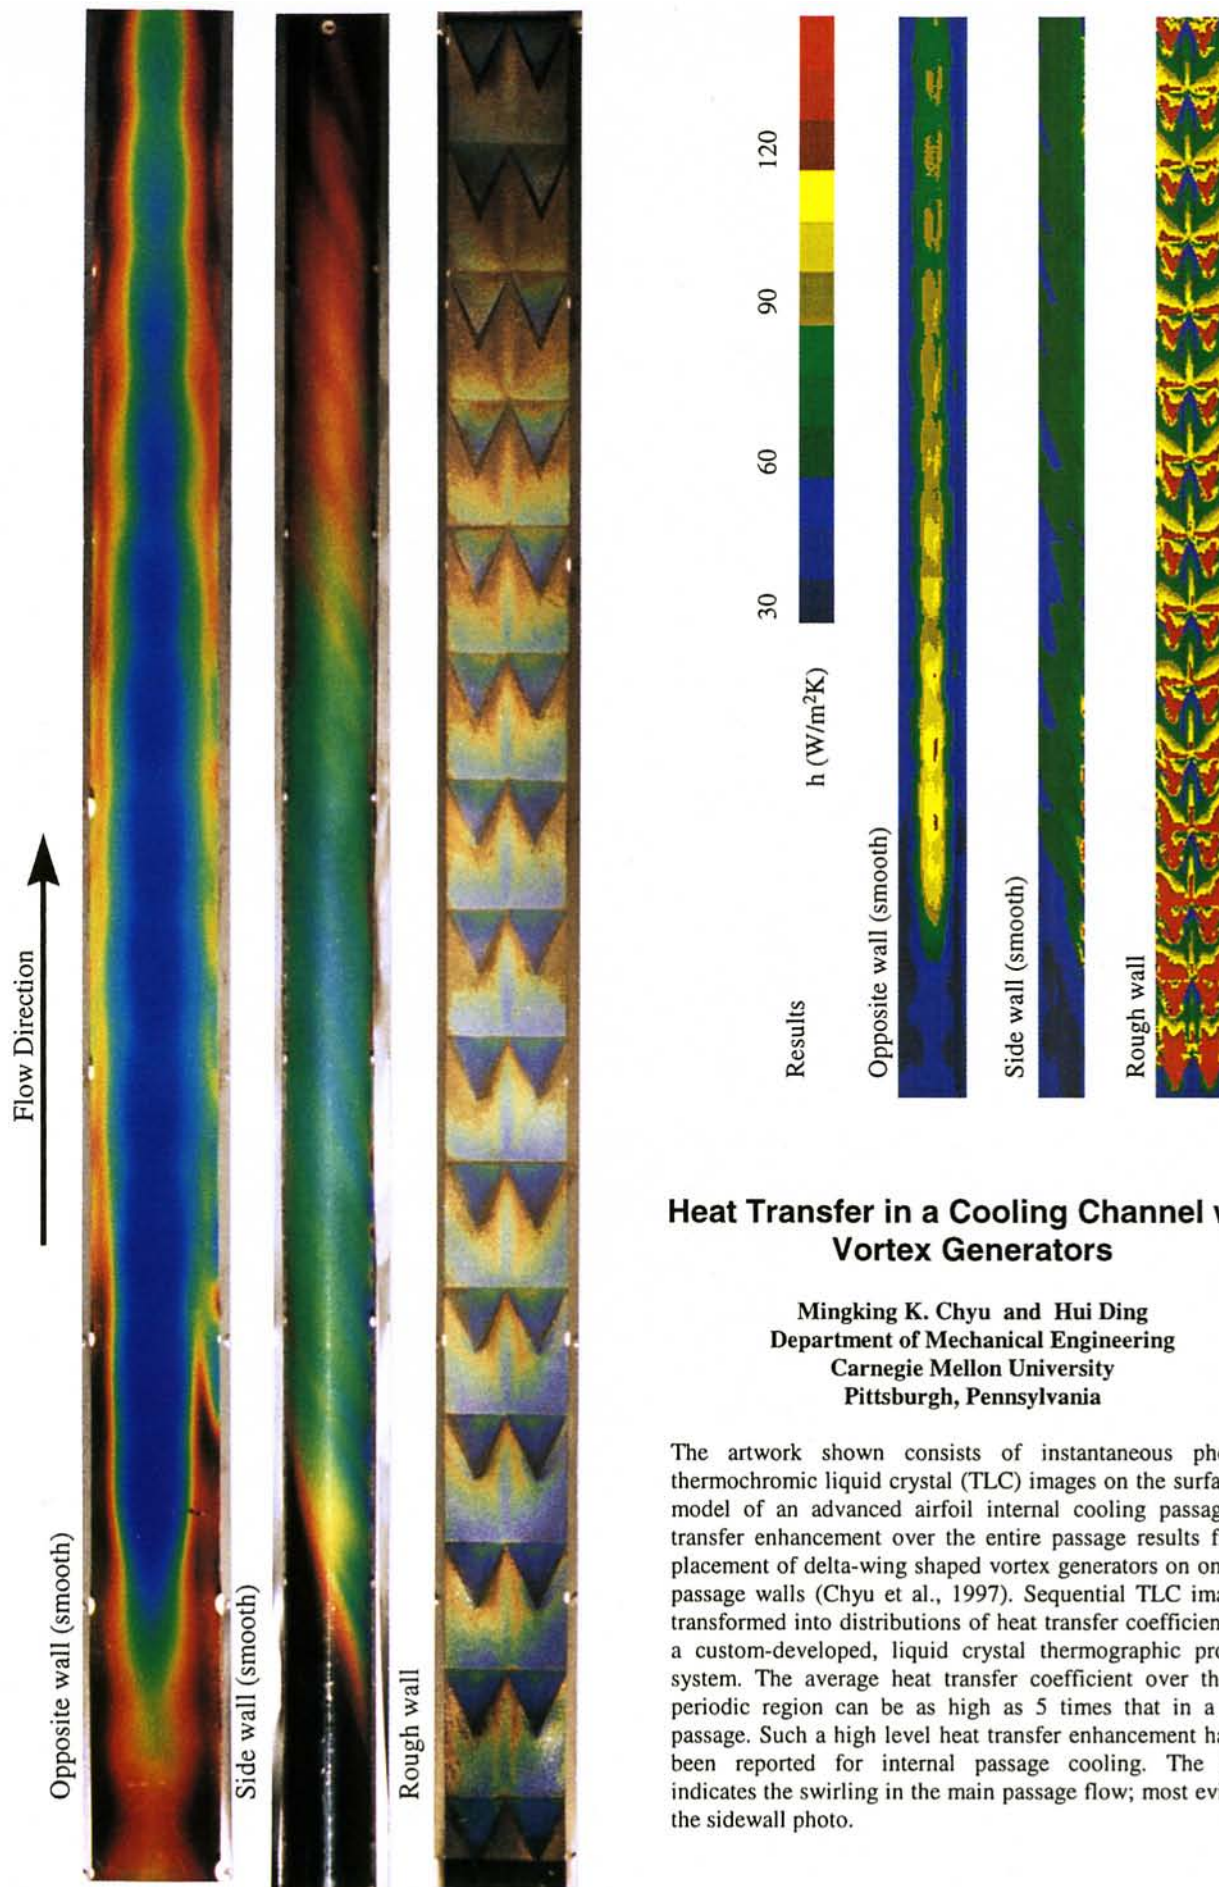

## Heat Transfer in a Cooling Channel with Vortex Generators

Mingking K. Chyu and Hui Ding  
Department of Mechanical Engineering  
Carnegie Mellon University  
Pittsburgh, Pennsylvania

The artwork shown consists of instantaneous photos of thermochromic liquid crystal (TLC) images on the surfaces of a model of an advanced airfoil internal cooling passage. Heat transfer enhancement over the entire passage results from the placement of delta-wing shaped vortex generators on one of the passage walls (Chyu et al., 1997). Sequential TLC images are transformed into distributions of heat transfer coefficients using a custom-developed, liquid crystal thermographic processing system. The average heat transfer coefficient over the entire periodic region can be as high as 5 times that in a smooth passage. Such a high level heat transfer enhancement has never been reported for internal passage cooling. The artwork indicates the swirling in the main passage flow; most evident on the sidewall photo.
